# Supplementary material for: Metabolic Mechanisms of Coloration and Decoloration in Juvenile Blood Parrotfish (Vieja melanurus ♀ × Amphilophus citrinellus ♂) Revealed by UHPLC-Q-TOF/MS
Source: Research Square preprint supplement (doi:10.21203/rs.3.rs-7107321/v1), 2025-08-29

Figure S1. Flowchart of experimental design.


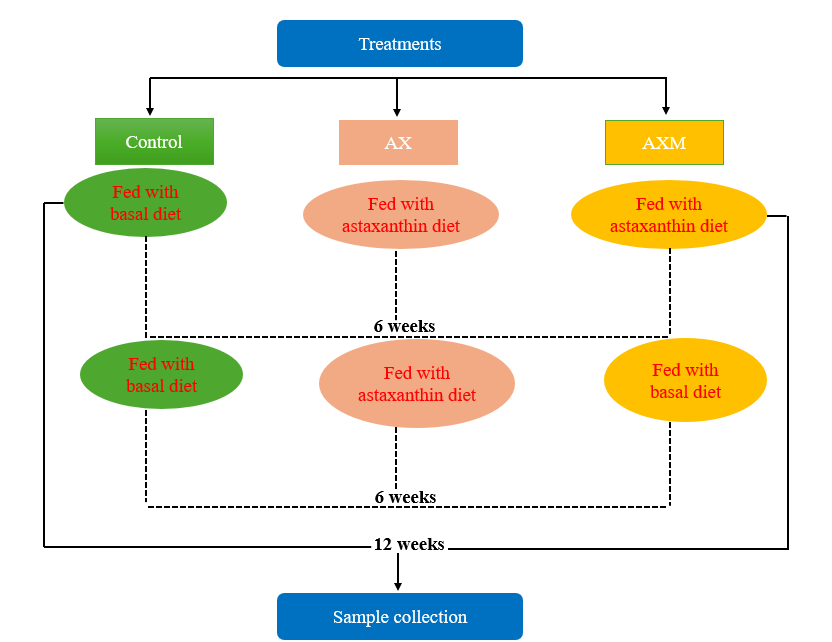


Figure S2. Corresponding permutation test of Wk6CvsWk0C2, Wk12CvsWk6C, Wk6AXvsWk0C, Wk6AXvsWk6C, Wk12AXvsWk12C, Wk12AXvsWk6AX, Wk12AXMvsWk12C, and Wk12AXMvsWk12AX following negative mode (A) and positive mode (B). Where C is control, AX is coloration, and AXM is decoloration.

(A)


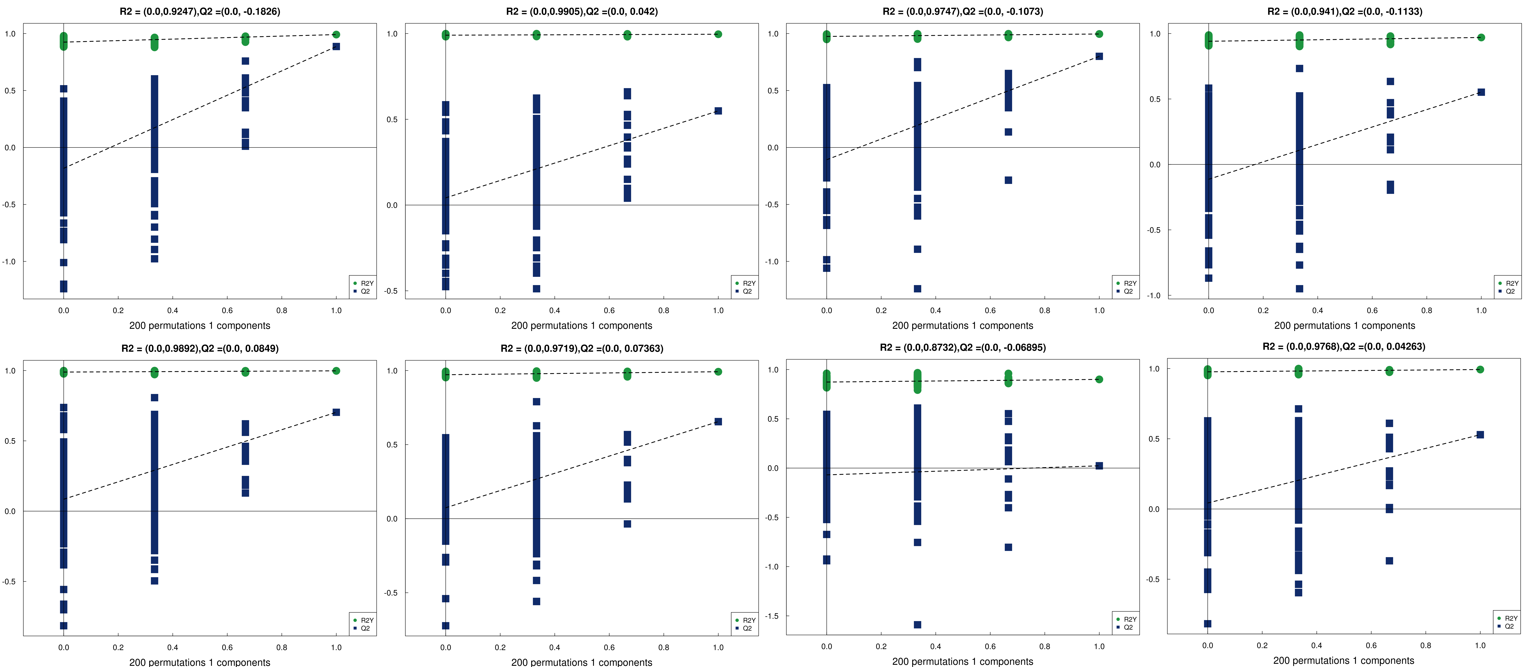


(B)


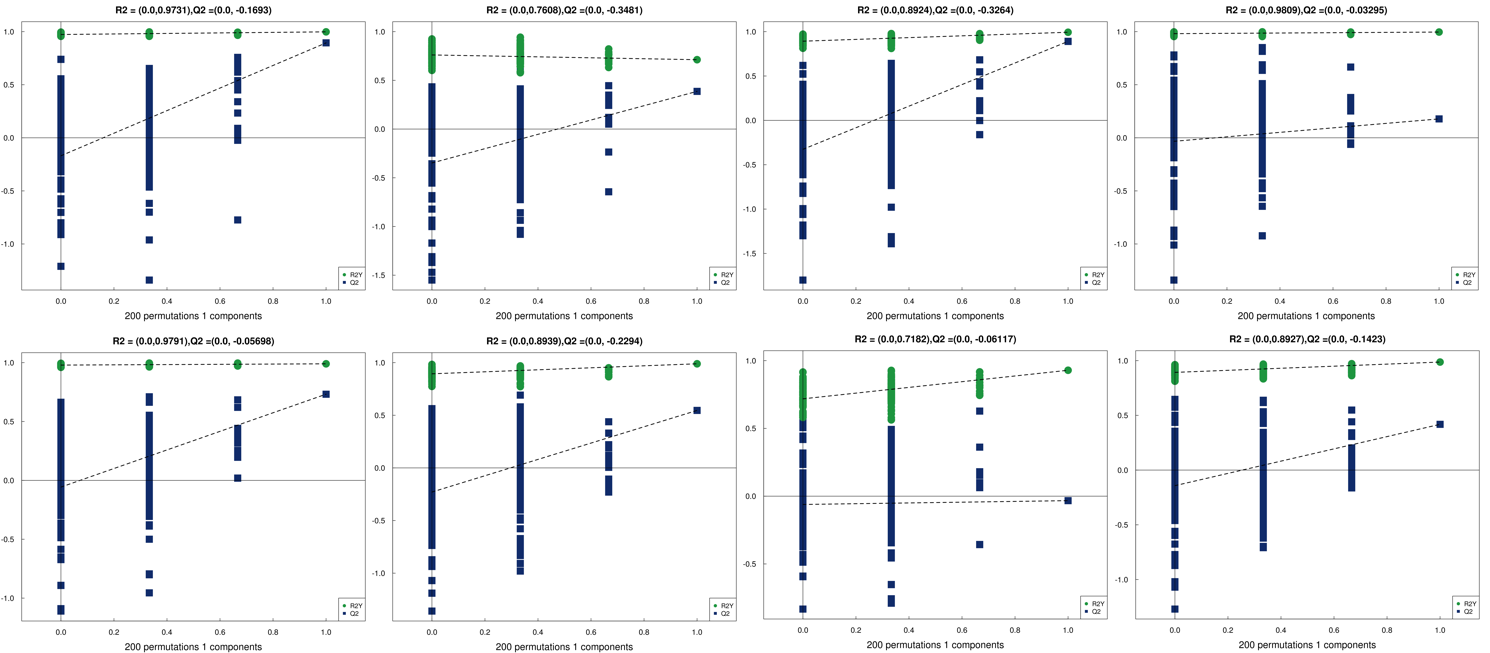

Supplement: Supplementary file 1 [file 563e5df54058c9ce00cdca15.docx]
